# Supplementary material for: (C3N6H7)BF4·H2O and (C3N6H7)SO3CH3·H2O with large birefringence induced by coplanar π-conjugated [C3N6H7]+ groups
Source: Royal Society of Chemistry journal article supplement (doi:10.1039/d4qi01061b), 2024-01-01
Supplement: d4qi01061b1.pdf [file d4qi01061b1.pdf]

## Supplementary Information

Hangwei Jia <sup>1</sup>, Die Xu <sup>1</sup>, Zijian Li <sup>1,2</sup>, Muhammad Arif <sup>1,2</sup>, Yansheng Jiang <sup>1</sup>, Xueling Hou <sup>1,2\*</sup>

<sup>1</sup>Research Center for Crystal Materials; State Key Laboratory of Functional Materials and Devices for Special Environmental Conditions; Xinjiang Key Laboratory of Functional Crystal Materials; Xinjiang Technical Institute of Physics and Chemistry, Chinese Academy of Sciences, 40-1 South Beijing Road, Urumqi 830011, China

<sup>2</sup>Center of Materials Science and Optoelectronics Engineering, University of Chinese Academy of Sciences, Beijing 100049, China

E-mail: xlhou@ms.xjb.ac.cn

### Table of Contents

|                                                                                                                                                                                                 |    |
|-------------------------------------------------------------------------------------------------------------------------------------------------------------------------------------------------|----|
| <b>Fig. S1</b> The theoretical morphology of $(C_3N_6H_7)BF_4 \cdot H_2O$ .....                                                                                                                 | 2  |
| <b>Fig. S2</b> Infrared spectra for (a) $(C_3N_6H_7)BF_4 \cdot H_2O$ and (b) $(C_3N_6H_7)SO_3CH_3 \cdot H_2O$ .....                                                                             | 2  |
| <b>Fig. S3</b> Experiment band gap for (a) $(C_3N_6H_7)BF_4 \cdot H_2O$ and (b) $(C_3N_6H_7)SO_3CH_3 \cdot H_2O$ .....                                                                          | 2  |
| <b>Fig. S4</b> Comparisons of the orientation of $[C_3H_7N_6]^+$ groups in reported compounds. ....                                                                                             | 3  |
| <b>Fig. S5</b> Electronic band structures for (a) $(C_3N_6H_7)BF_4 \cdot H_2O$ and (b) $(C_3N_6H_7)SO_3CH_3 \cdot H_2O$ .....                                                                   | 4  |
| <b>Table S1.</b> Crystallographic data for $(C_3N_6H_7)BF_4 \cdot H_2O$ and $(C_3N_6H_7)SO_3CH_3 \cdot H_2O$ . ....                                                                             | 5  |
| <b>Table S2.</b> The fractional atomic coordinates ( $\times 10^4$ ) and equivalent isotropic displacement parameters ( $\text{\AA}^2 \times 10^3$ ) for $(C_3N_6H_7)BF_4 \cdot H_2O$ .....     | 6  |
| <b>Table S3.</b> Bond lengths [ $\text{\AA}$ ] and angles [ $^\circ$ ] for $(C_3N_6H_7)BF_4 \cdot H_2O$ . ....                                                                                  | 7  |
| <b>Table S4.</b> Hydrogen bonds for $(C_3N_6H_7)BF_4 \cdot H_2O$ .....                                                                                                                          | 7  |
| <b>Table S5.</b> The fractional atomic coordinates ( $\times 10^4$ ) and equivalent isotropic displacement parameters ( $\text{\AA}^2 \times 10^3$ ) for $(C_3N_6H_7)SO_3CH_3 \cdot H_2O$ ..... | 8  |
| <b>Table S6.</b> Bond lengths [ $\text{\AA}$ ] and angles [ $^\circ$ ] for $(C_3N_6H_7)SO_3CH_3 \cdot H_2O$ . ....                                                                              | 9  |
| <b>Table S7.</b> Hydrogen bonds for $(C_3N_6H_7)SO_3CH_3 \cdot H_2O$ .....                                                                                                                      | 9  |
| <b>Table S8.</b> Comparisons of the $[C_3N_6H_7]^+$ density, optical properties in reported compounds.....                                                                                      | 10 |

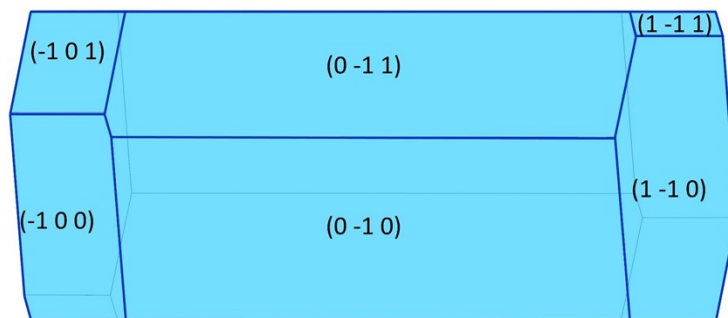

**Fig. S1** The theoretical morphology of  $(C_3N_6H_7)BF_4 \cdot H_2O$ .

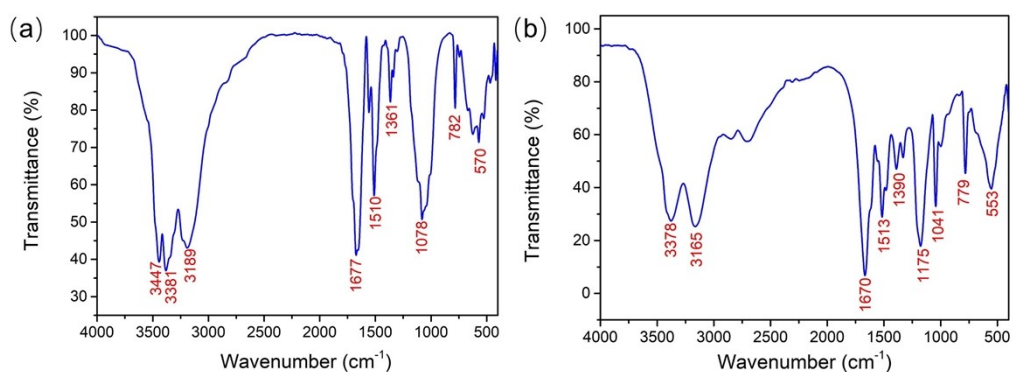

**Fig. S2** Infrared spectra for (a)  $(C_3N_6H_7)BF_4 \cdot H_2O$  and (b)  $(C_3N_6H_7)SO_3CH_3 \cdot H_2O$ .

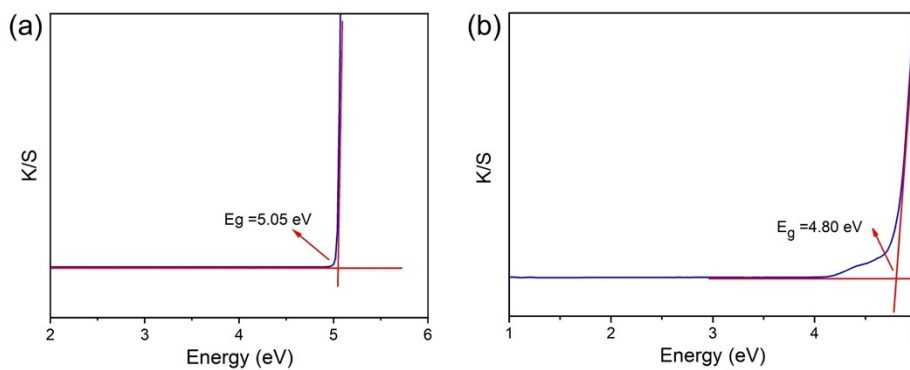

**Fig. S3** Experiment band gap for (a)  $(C_3N_6H_7)BF_4 \cdot H_2O$  and (b)  $(C_3N_6H_7)SO_3CH_3 \cdot H_2O$ .

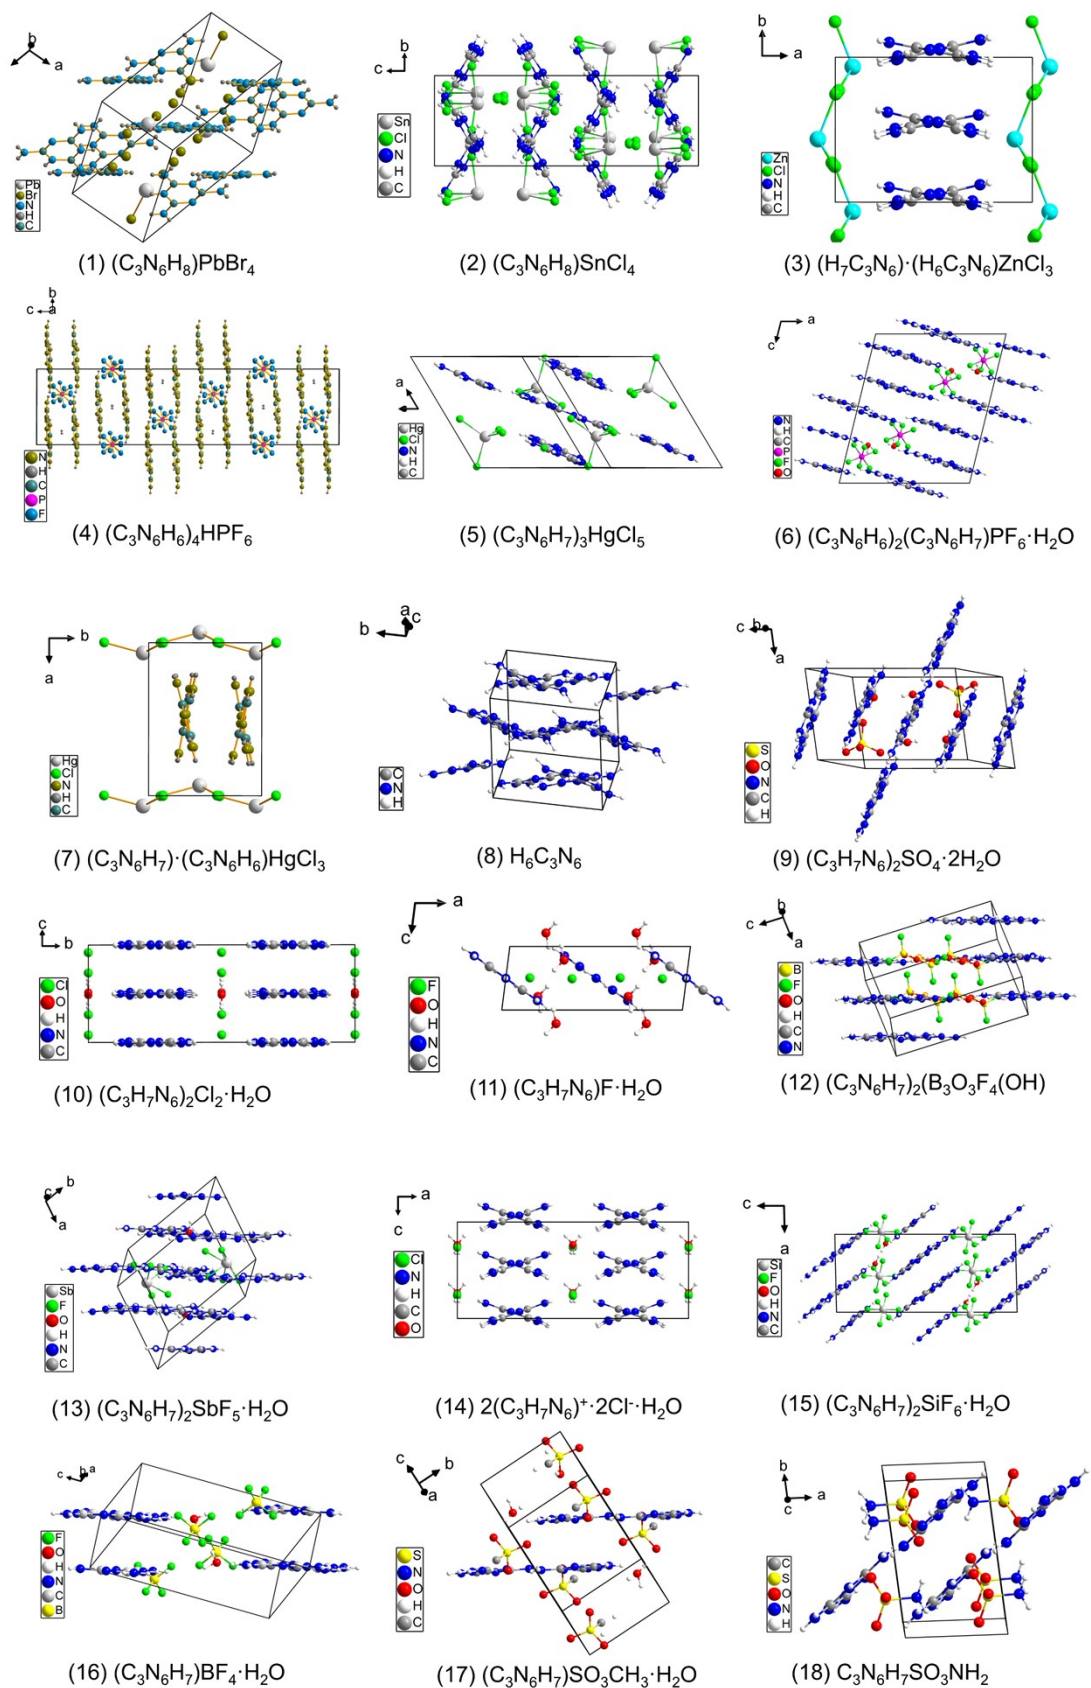

**Fig. S4** Comparisons of the orientation of  $[C_3H_7N_6]^+$  groups in reported compounds.

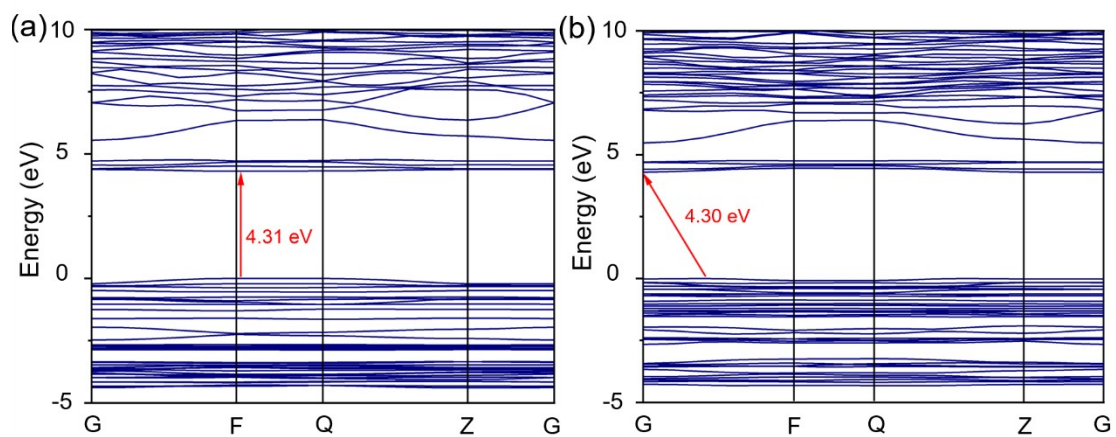

**Fig. S5** Electronic band structures for (a)  $(\text{C}_3\text{N}_6\text{H}_7)\text{BF}_4 \cdot \text{H}_2\text{O}$  and (b)  $(\text{C}_3\text{N}_6\text{H}_7)\text{SO}_3\text{CH}_3 \cdot \text{H}_2\text{O}$ .

**Table S1.** Crystallographic data for (C<sub>3</sub>N<sub>6</sub>H<sub>7</sub>)BF<sub>4</sub>·H<sub>2</sub>O and (C<sub>3</sub>N<sub>6</sub>H<sub>7</sub>)SO<sub>3</sub>CH<sub>3</sub>·H<sub>2</sub>O.

| Empirical formula                                                                                      | (C <sub>3</sub> N <sub>6</sub> H <sub>7</sub> )BF <sub>4</sub> ·H <sub>2</sub> O | (C <sub>3</sub> N <sub>6</sub> H <sub>7</sub> )BF <sub>4</sub> ·H <sub>2</sub> O | (C <sub>3</sub> N <sub>6</sub> H <sub>7</sub> )SO <sub>3</sub> CH <sub>3</sub> ·H <sub>2</sub> O |
|--------------------------------------------------------------------------------------------------------|----------------------------------------------------------------------------------|----------------------------------------------------------------------------------|--------------------------------------------------------------------------------------------------|
| Formula weight                                                                                         | 231.97                                                                           | 231.97                                                                           | 240.026                                                                                          |
| Temperature/K                                                                                          | 153                                                                              | 298                                                                              | 298                                                                                              |
| Crystal system                                                                                         | Triclinic                                                                        | Triclinic                                                                        | Triclinic                                                                                        |
| Space group                                                                                            | P                                                                                | P                                                                                | P                                                                                                |
| <i>a</i> /Å                                                                                            | 5.5980(9)                                                                        | 5.7474(7)                                                                        | 6.5998(9)                                                                                        |
| <i>b</i> /Å                                                                                            | 7.4799(13)                                                                       | 7.4778(9)                                                                        | 6.7955(9)                                                                                        |
| <i>c</i> /Å                                                                                            | 11.727(2)                                                                        | 11.7695(14)                                                                      | 12.2611(15)                                                                                      |
| <i>α</i> /°                                                                                            | 102.107(6)                                                                       | 101.789(5)                                                                       | 76.662(5)                                                                                        |
| <i>β</i> /°                                                                                            | 94.096(6)                                                                        | 94.130(5)                                                                        | 85.122(4)                                                                                        |
| <i>γ</i> /°                                                                                            | 110.999(6)                                                                       | 110.156(5)                                                                       | 71.706(4)                                                                                        |
| Volume/Å <sup>3</sup>                                                                                  | 442.40(13)                                                                       | 459.22(10)                                                                       | 507.97(12)                                                                                       |
| <i>Z</i>                                                                                               | 2                                                                                | 2                                                                                | 2                                                                                                |
| $\rho_{calc.}$ / g/cm <sup>3</sup>                                                                     | 1.741                                                                            | 1.678                                                                            | 1.571                                                                                            |
| $\mu$ /mm <sup>-1</sup>                                                                                | 0.182                                                                            | 0.175                                                                            | 0.328                                                                                            |
| <i>F</i> (000)                                                                                         | 236                                                                              | 236                                                                              | 252                                                                                              |
| Radiation                                                                                              | Mo K $\alpha$ ( $\lambda$ = 0.71073)                                             | Mo K $\alpha$ ( $\lambda$ = 0.71073)                                             | Mo K $\alpha$ ( $\lambda$ = 0.71073)                                                             |
| <i>2θ</i> range/°                                                                                      | 1.799 to 25.337                                                                  | 1.789 to 25.342                                                                  | 3.414 to 50.734                                                                                  |
| Index ranges                                                                                           | -6 ≤ <i>h</i> ≤ 6, -8 ≤ <i>k</i> ≤ 8, -14 ≤ <i>l</i> ≤ 14                        | -6 ≤ <i>h</i> ≤ 6, -8 ≤ <i>k</i> ≤ 8, -14 ≤ <i>l</i> ≤ 14                        | -7 ≤ <i>h</i> ≤ 7, -8 ≤ <i>k</i> ≤ 8, -14 ≤ <i>l</i> ≤ 14                                        |
| Reflns collected                                                                                       | 5462                                                                             | 6159                                                                             | 8526                                                                                             |
| Unique reflns ( <i>R</i> <sub>int</sub> )                                                              | 1594 [ <i>R</i> <sub>int</sub> = 0.0525]                                         | 1644 [ <i>R</i> <sub>int</sub> = 0.0408]                                         | 1845 [ <i>R</i> <sub>int</sub> = 0.0870]                                                         |
| Data/restraints/param                                                                                  | 1594 / 0 / 140                                                                   | 1644/4/186                                                                       | 1845/0/141                                                                                       |
| Goodness-of-fit on <i>F</i> <sup>2</sup>                                                               | 1.151                                                                            | 1.039                                                                            | 1.061                                                                                            |
| <i>R</i> <sub>1</sub> <sup>a</sup> / <i>wR</i> <sub>2</sub> <sup>b</sup> [ <i>I</i> ≥ 2σ ( <i>I</i> )] | 0.0415/0.1026                                                                    | 0.0526/0.1314                                                                    | 0.0494/0.1146                                                                                    |
| <i>R</i> <sub>1</sub> <sup>a</sup> / <i>wR</i> <sub>2</sub> <sup>b</sup> [all data]                    | 0.0457/0.1076                                                                    | 0.0695/0.1480                                                                    | 0.0656/0.1323                                                                                    |
| Largest diff. peak/hole / e Å <sup>-3</sup>                                                            | 0.43/-0.44                                                                       | 0.28/-0.24                                                                       | 0.45/-0.37                                                                                       |

<sup>a</sup>  $R_1 = \sum ||F_o| - |F_c|| / \sum |F_o|$  and  $wR_2 = [\sum w(F_o^2 - F_c^2)^2 / \sum wF_o^4]^{1/2}$  for  $F_o^2 > 2\sigma(F_o^2)$

**Table S2.** The fractional atomic coordinates ( $\times 10^4$ ) and equivalent isotropic displacement parameters ( $\text{\AA}^2 \times 10^3$ ) for  $(\text{C}_3\text{N}_6\text{H}_7)\text{BF}_4 \cdot \text{H}_2\text{O}$ .

| Atom | x        | y       | z        | U(eq) |
|------|----------|---------|----------|-------|
| C(1) | 2909(3)  | 8601(2) | 7925(2)  | 18(1) |
| C(2) | 2061(3)  | 7934(2) | 9688(2)  | 19(1) |
| C(3) | 4392(3)  | 6428(3) | 8662(2)  | 19(1) |
| N(1) | 2811(3)  | 9497(2) | 7078(1)  | 25(1) |
| N(2) | 1792(3)  | 8903(2) | 8863(1)  | 20(1) |
| N(3) | 1018(3)  | 8250(2) | 10650(1) | 23(1) |
| N(4) | 3328(3)  | 6688(2) | 9622(1)  | 20(1) |
| N(5) | 5657(3)  | 5229(2) | 8501(1)  | 25(1) |
| N(6) | 4246(3)  | 7382(2) | 7805(1)  | 20(1) |
| B(1) | 11067(4) | 7698(3) | 3696(2)  | 22(1) |
| F(1) | 10915(2) | 6349(2) | 2640(1)  | 27(1) |
| F(2) | 11740(2) | 9560(2) | 3481(1)  | 33(1) |
| F(3) | 8691(2)  | 7178(2) | 4065(1)  | 43(1) |
| F(4) | 12948(3) | 7715(2) | 4540(1)  | 40(1) |
| O(1) | 6889(3)  | 6214(2) | 6134(1)  | 29(1) |

$U_{\text{eq}}$  is defined as 1/3 of the trace of the orthogonalised  $U_{ij}$  tensor.

**Table S3.** Bond lengths [ $\text{\AA}$ ] and angles [ $^\circ$ ] for  $(\text{C}_3\text{N}_6\text{H}_7)\text{BF}_4 \cdot \text{H}_2\text{O}$ .

| Atom- Atom | Length[Å] | Atom- Atom- Atom | Angle[°]   |
|------------|-----------|------------------|------------|
| C1-N1      | 1.317(2)  | C(1)-N(2)-C(2)   | 115.96(14) |
| C1-N2      | 1.322(2)  | C(3)-N(4)-C(2)   | 115.72(14) |
| C1-N6      | 1.364(2)  | C(3)-N(6)-C(1)   | 119.24(15) |
| C2-N2      | 1.355(2)  | F(2)-B(1)-F(1)   | 108.18(15) |
| C2-N3      | 1.323(2)  | F(3)-B(1)-F(1)   | 109.67(16) |
| C2-N4      | 1.353(2)  | F(3)-B(1)-F(2)   | 108.90(15) |
| C3-N4      | 1.322(2)  | F(3)-B(1)-F(4)   | 111.03(16) |
| C3-N5      | 1.321(2)  | F(4)-B(1)-F(1)   | 109.05(15) |
| C3-N6      | 1.363(2)  | F(4)-B(1)-F(2)   | 109.97(16) |
| B1-F1      | 1.400(2)  | N(1)-C(1)-N(2)   | 121.07(15) |
| B1-F2      | 1.389(2)  | N(1)-C(1)-N(6)   | 117.44(15) |
| B1-F3      | 1.374(2)  | N(2)-C(1)-N(6)   | 121.47(15) |
| B1-F4      | 1.387(2)  | N(3)-C(2)-N(2)   | 117.20(15) |
|            |           | N(3)-C(2)-N(4)   | 117.00(15) |
|            |           | N(4)-C(2)-N(2)   | 125.79(15) |
|            |           | N(4)-C(3)-N(6)   | 121.79(15) |
|            |           | N(5)-C(3)-N(4)   | 120.82(16) |
|            |           | N(5)-C(3)-N(6)   | 117.38(16) |

**Table S4.** Hydrogen bonds for (C<sub>3</sub>N<sub>6</sub>H<sub>7</sub>)BF<sub>4</sub>·H<sub>2</sub>O.

| D-H                 | d(D-H) | d(H...A) | d(D...A)   | ∠DHA  |
|---------------------|--------|----------|------------|-------|
| O(1)-H(1C)...F(3)   | 0.87   | 2.03     | 2.8266(18) | 150.9 |
| N(6)-H(6)...O(1)    | 0.88   | 1.88     | 2.7231(19) | 158.9 |
| N(5)-H(5B)...F(1)#1 | 0.88   | 2.20     | 2.8621(19) | 132.2 |

Symmetry transformations used to generate equivalent atoms:

#1 -x+2,-y+1,-z+1

**Table S5.** The fractional atomic coordinates ( $\times 10^4$ ) and equivalent isotropic

displacement parameters ( $\text{\AA}^2 \times 10^3$ ) for  $(\text{C}_3\text{N}_6\text{H}_7)\text{SO}_3\text{CH}_3 \cdot \text{H}_2\text{O}$ .

| Atom | x           | y          | z          | U(eq)    |
|------|-------------|------------|------------|----------|
| C1   | 7515(4)     | 5336(4)    | 3876(2)    | 30.3(7)  |
| C2   | 4840(4)     | 4269(4)    | 3258(2)    | 31.3(7)  |
| C3   | 6876(4)     | 2272(4)    | 4752(2)    | 30.7(7)  |
| C4   | 8091(6)     | 2833(6)    | 701(3)     | 52.3(9)  |
| N1   | 5951(4)     | 5683(4)    | 3139(2)    | 32.6(6)  |
| N2   | 5309(4)     | 2507(4)    | 4045(2)    | 33.0(6)  |
| N3   | 7974(4)     | 3663(4)    | 4719.0(19) | 30.4(6)  |
| N4   | 8545(4)     | 6762(4)    | 3725(2)    | 40.4(7)  |
| N5   | 3293(4)     | 4719(4)    | 2539(2)    | 43.1(7)  |
| N6   | 7360(4)     | 526(4)     | 5544(2)    | 39.4(7)  |
| O1   | 10244(4)    | 2412(5)    | 2439(2)    | 62.3(8)  |
| O2   | 10542(4)    | -742(4)    | 1789(2)    | 65.3(8)  |
| O3   | 12159(4)    | 1827(4)    | 741(2)     | 58.3(7)  |
| O4   | 5929(4)     | 8762(5)    | 1365(2)    | 73.1(10) |
| S1   | 10402.4(12) | 1470.5(12) | 1483.3(6)  | 38.1(3)  |

$U_{\text{eq}}$  is defined as 1/3 of the trace of the orthogonalised  $U_{ij}$  tensor.

**Table S6.** Bond lengths [ $\text{\AA}$ ] and angles [ $^\circ$ ] for  $(\text{C}_3\text{N}_6\text{H}_7)\text{SO}_3\text{CH}_3 \cdot \text{H}_2\text{O}$ .



| Atom- Atom | Length[Å] | Atom     | Angle[°]   |
|------------|-----------|----------|------------|
| C1-N1      | 1.358(4)  | C1-N3-C3 | 115.4(2)   |
| C1-N3      | 1.322(4)  | C2-N1-C1 | 119.5(3)   |
| C1-N4      | 1.321(4)  | C2-N2-C3 | 115.7(2)   |
| C2-N1      | 1.357(4)  | N2-C2-N1 | 121.5(3)   |
| C2-N2      | 1.321(4)  | N2-C2-N5 | 121.6(3)   |
| C2-N5      | 1.322(4)  | N3-C1-N1 | 121.7(3)   |
| C3-N2      | 1.354(4)  | N3-C3-N2 | 126.0(3)   |
| C3-N3      | 1.352(4)  | N4-C1-N1 | 117.1(3)   |
| C3-N6      | 1.318(4)  | N4-C1-N3 | 121.2(3)   |
| S1-C4      | 1.748(3)  | N5-C2-N1 | 116.9(3)   |
| S1-O1      | 1.441(3)  | N6-C3-N2 | 116.5(3)   |
| S1-O2      | 1.438(3)  | N6-C3-N3 | 117.5(3)   |
| S1-O3      | 1.458(2)  | O1-S1-C4 | 107.18(17) |
|            |           | O1-S1-O3 | 111.02(17) |
|            |           | O2-S1-C4 | 108.28(18) |
|            |           | O2-S1-O1 | 112.98(18) |
|            |           | O2-S1-O3 | 111.60(16) |
|            |           | O3-S1-C4 | 105.35(17) |

**Table S7.** Hydrogen bonds for (C<sub>3</sub>N<sub>6</sub>H<sub>7</sub>)SO<sub>3</sub>CH<sub>3</sub>·H<sub>2</sub>O.

| D-H           | d(D-H) | d(H...A)  | d(D...A) | ∠DHA       |
|---------------|--------|-----------|----------|------------|
| N1-H1...O4    | 0.8700 | 1.803(4)  | 2.645(4) | 162.09(11) |
| N5-H5A...O1#3 | 0.8700 | 2.087(4)  | 2.938(4) | 165.82(11) |
| O4-H4F...O3#1 | 0.8599 | 1.880(10) | 2.729(4) | 169(5)     |
| O4-H4G...O3#2 | 0.8598 | 1.994(12) | 2.833(4) | 165(4)     |

Symmetry transformations used to generate equivalent atoms: #1+0 #2 x+2,y+1,z #3+0

**Table S8.** Comparisons of the  $[\text{C}_3\text{N}_6\text{H}_7]^+$  density, optical properties in reported compounds.

| No | Species                                                                                                    | Band gap (eV)     | Density ( $\times 10^{-3} \text{ \AA}$ ) | Birefringence (@546 nm) <sup>c</sup> | UV Cut-off(nm) |
|----|------------------------------------------------------------------------------------------------------------|-------------------|------------------------------------------|--------------------------------------|----------------|
| 1  | $(\text{C}_3\text{N}_6\text{H}_8)\text{PbBr}_4^1$                                                          | 3.13 <sup>e</sup> | 3.14                                     | 0.29@550nm                           | 374            |
| 2  | $(\text{C}_3\text{N}_6\text{H}_8)\text{SnCl}_4^2$                                                          | 3.71 <sup>e</sup> | 3.45                                     | 0.34@550nm                           | 334            |
| 3  | $(\text{H}_7\text{C}_3\text{N}_6) \cdot (\text{H}_6\text{C}_3\text{N}_6)\text{ZnCl}_3^3$                   | 3.95 <sup>e</sup> | 5.35                                     | 0.26@1064nm                          | 236            |
| 4  | $(\text{C}_3\text{N}_6\text{H}_6)_4\text{HPF}_6^4$                                                         | 4.12 <sup>e</sup> | 4.57                                     | 0.26                                 | 300            |
| 5  | $(\text{C}_3\text{N}_6\text{H}_7)_3\text{HgCl}_5^5$                                                        | 4.19 <sup>e</sup> | 3.38                                     | 0.093 @1064nm                        | 290            |
| 6  | $(\text{C}_3\text{N}_6\text{H}_6)_2(\text{C}_3\text{N}_6\text{H}_7)\text{PF}_6 \cdot \text{H}_2\text{O}^4$ | 4.20 <sup>e</sup> | 5.77                                     | 0.24                                 | 300            |
| 7  | $(\text{C}_3\text{N}_6\text{H}_7) \cdot (\text{C}_3\text{N}_6\text{H}_6)\text{HgCl}_3^5$                   | 4.40 <sup>e</sup> | 5.23                                     | 0.25@1064nm                          | 278            |
| 8  | $\text{H}_6\text{C}_3\text{N}_6^6$                                                                         | 4.60 <sup>e</sup> | 7.73                                     | 0.26                                 | 248            |
| 9  | $(\text{C}_3\text{H}_7\text{N}_6)_6(\text{H}_2\text{PO}_4)_4(\text{HPO}_4) \cdot 4\text{H}_2\text{O}^7$    | 4.6 <sup>e</sup>  | /                                        | 0.22@1064nm                          | /              |
| 10 | $(\text{C}_3\text{H}_7\text{N}_6)_2\text{SO}_4 \cdot 2\text{H}_2\text{O}^7$                                | 4.62 <sup>e</sup> | 5.25                                     | /                                    | /              |
| 11 | $(\text{C}_3\text{H}_7\text{N}_6)_2\text{Cl}_2 \cdot \text{H}_2\text{O}^6$                                 | 4.70 <sup>e</sup> | 5.63                                     | 0.33@550nm                           | 230            |
| 12 | $(\text{C}_3\text{H}_7\text{N}_6)\text{F} \cdot \text{H}_2\text{O}^6$                                      | 4.72 <sup>e</sup> | 6.00                                     | 0.38@550nm                           | 220            |
| 13 | $(\text{C}_3\text{N}_6\text{H}_7)_2(\text{B}_3\text{O}_3\text{F}_4(\text{OH}))^8$                          | 4.72 <sup>e</sup> | 4.98                                     | 0.44                                 | 240            |
| 14 | $(\text{C}_3\text{N}_6\text{H}_7)_2\text{SbF}_5 \cdot \text{H}_2\text{O}^9$                                | 4.74 <sup>e</sup> | 4.89                                     | 0.38@550nm                           | 220            |
| 15 | $2(\text{C}_3\text{H}_7\text{N}_6)^+ \cdot 2\text{Cl}^- \cdot \text{H}_2\text{O}^{10}$                     | 4.75 <sup>e</sup> | 5.58                                     | 0.28                                 | 245            |
| 16 | $(\text{C}_3\text{N}_6\text{H}_7)_2\text{SiF}_6 \cdot \text{H}_2\text{O}^{11}$                             | 4.76 <sup>e</sup> | 5.31                                     | 0.15@550nm                           | 220            |
| 17 | $(\text{C}_3\text{N}_6\text{H}_7)\text{SO}_3\text{CH}_3 \cdot \text{H}_2\text{O}$                          | 4.80 <sup>e</sup> | 3.94                                     | 0.31                                 | 233            |
| 18 | $(\text{C}_3\text{N}_6\text{H}_7)\text{BF}_4 \cdot \text{H}_2\text{O}$                                     | 5.05 <sup>e</sup> | 3.39                                     | 0.37                                 | 244            |
| 19 | $\text{C}_3\text{N}_6\text{H}_7\text{SO}_3\text{NH}_2^{12}$                                                | 5.53 <sup>e</sup> | 3.20                                     | 0.34                                 | 206            |

Note: Upper corner "e" is the experimental value, upper corner "c" is the theoretical calculation value.

## References

1. W. Q. Huang, X. Zhang, Y. Q. Li, Y. Zhou, X. Chen, X. Q. Li, F. F. Wu, M. C. Hong, J. H. Luo and S. G. Zhao, A hybrid halide perovskite birefringent crystal, *Angew. Chem. Int. Ed.*, 2022, **61**, e202202746.
2. W. Q. Huang, X. L. Wu, B. Ahmed, Y. Q. Li, Y. Zhou, H. Wang, Y. P. Song, X. J. Kuang, J. H. Luo and S. G. Zhao, A hybrid halide lead-free pseudo-perovskite with large birefringence, *Inorg. Chem. Front.*, 2023, **10**, 2039.
3. L. H. Liu, Z. Y. Bai, L. Hu, D. S. Wei, Z. B. Lin and L. Z. Zhang, A melamine-based organic–inorganic hybrid material revealing excellent optical performance and moderate thermal stability, *J. Mater. Chem. C*, 2021, **9**, 7452.
4. L. H. Liu, F. F. Yuan, Y. S. Huang, Z. B. Lin and L. Z. Zhang, Two UV optical crystals with strong optical anisotropy, large band gaps and an alpha-BBO type structure, *Dalton Trans*, 2023, **52**, 5798.
5. Z. Y. Bai, J. Lee, H. Kim, C. L. Hu and K. M. Ok, Unveiling the superior optical properties of novel melamine-based nonlinear optical material with strong second-harmonic generation and giant optical anisotropy, *Small*, 2023, **19**, 2301756.
6. Y. G. Shen, L. Ma, G. F. Dong, H. L. Yu and J. H. Luo,  $\beta$ - $(\text{C}_3\text{H}_7\text{N}_6)_2\text{Cl}_2 \cdot \text{H}_2\text{O}$  and  $(\text{C}_3\text{H}_7\text{N}_6)\text{F} \cdot \text{H}_2\text{O}$ : two UV birefringent crystals induced by uniformly aligned structural groups, *Inorg. Chem. Front.*, 2023, **10**, 2022.
7. S. F. Li, L. Hu, Y. Ma, F. F. Mao, J. Zheng, X. D. Zhang and D. Yan, Noncentrosymmetric  $(\text{C}_3\text{H}_7\text{N}_6)_6(\text{H}_2\text{PO}_4)_4(\text{HPO}_4) \cdot 4\text{H}_2\text{O}$  and centrosymmetric  $(\text{C}_3\text{H}_7\text{N}_6)_2\text{SO}_4 \cdot 2\text{H}_2\text{O}$ : exploration of acentric structure by combining planar and tetrahedral motifs via hydrogen bonds, *Inorg. Chem.*,

- 2022, **61**, 10182.
8. C. C. Jin, F. M. Li, Z. H. Yang, S. L. Pan and M. Mutailipu,  $[\text{C}_3\text{N}_6\text{H}_7]_2[\text{B}_3\text{O}_3\text{F}_4(\text{OH})]$ : a new hybrid birefringent crystal with strong optical anisotropy induced by mixed functional units, *J. Mater. Chem. C*, 2022, **10**, 6590.
  9. Y. G. Shen, B. Chen, H. Chen and J. H. Luo,  $(\text{C}_3\text{N}_6\text{H}_7)_2\text{SbF}_5 \cdot \text{H}_2\text{O}$  exhibiting strong optical anisotropy from the optimal arrangement of  $\pi$ -conjugated  $(\text{C}_3\text{N}_6\text{H}_7)^+$  groups, *Inorg. Chem.*, 2022, **61**, 14242.
  10. L. H. Liu, C. L. Hu, Z. Y. Bai, F. F. Yuan, Y. S. Huang, L. Z. Zhang and Z. B. Lin,  $2(\text{C}_3\text{H}_7\text{N}_6)^+ \cdot 2\text{Cl}^- \cdot \text{H}_2\text{O}$ : an ultraviolet nonlinear optical crystal with large birefringence and strong second-harmonic generation, *Chem. Commun.*, 2020, **56**, 14657.
  11. Y. G. Shen, Y. W. Zhou, X. L. Xue, H. L. Yu, S. G. Zhao and J. H. Luo,  $(\text{C}_3\text{N}_6\text{H}_7)_2\text{SiF}_6 \cdot \text{H}_2\text{O}$ : an ultraviolet birefringent crystal exceeding the intrinsic energy gap of an organic reagent, *Inorg. Chem. Front.*, 2022, **9**, 5226.
  12. D. Y. Dou, Q. Shi, Y. J. Bai, C. Chen, B. B. Zhang and Y. Wang,  $\text{C}_3\text{N}_6\text{H}_7\text{SO}_3\text{NH}_2$ : non- $\pi$ -conjugated tetrahedra decoupling  $\pi$ -conjugated groups achieving large optical anisotropy and wide band gap, *Mater. Chem. Front.*, 2023, **7**, 5924.
